# Supplementary material for: On the behaviour of the tropopause folding events over the Tibetan Plateau
Source: Copernicus journal article supplement (doi:10.5194/acp-11-5113-2011), 2011-05-31
Supplement: Supplementary file 1 [file acp-11-5113-2011-supplement.zip]

# Sciamachy O3 Data for 2008/02/25 (Orbit 31307)

PRELIMINARY

SCIATRAN CDI O3

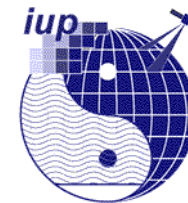

Sciamachy O3 Profile

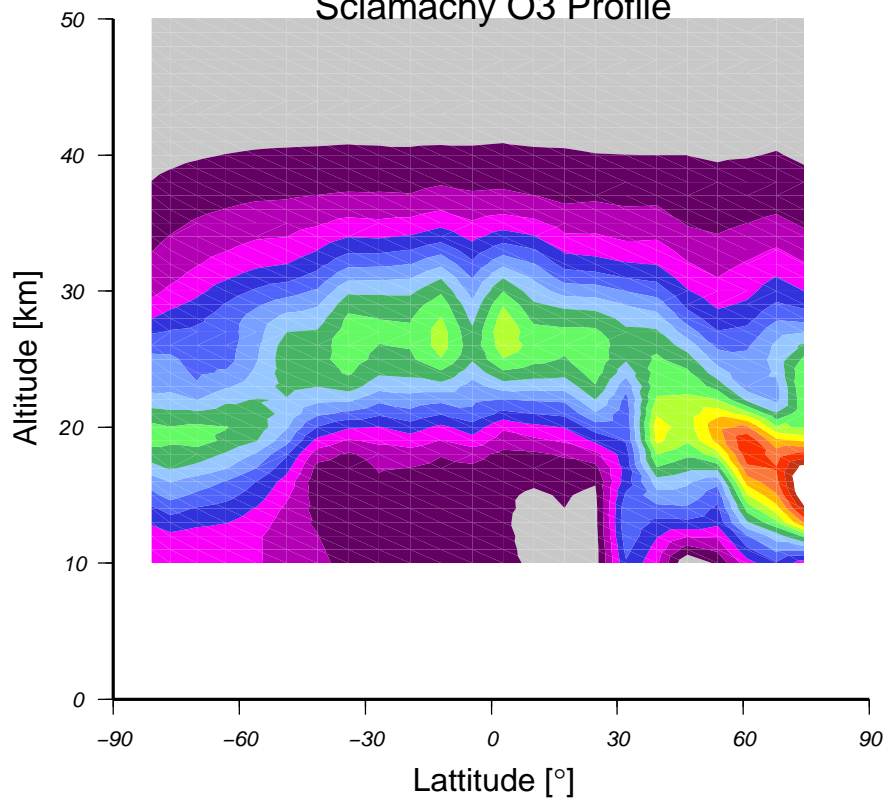

Sciamachy Integrated O3

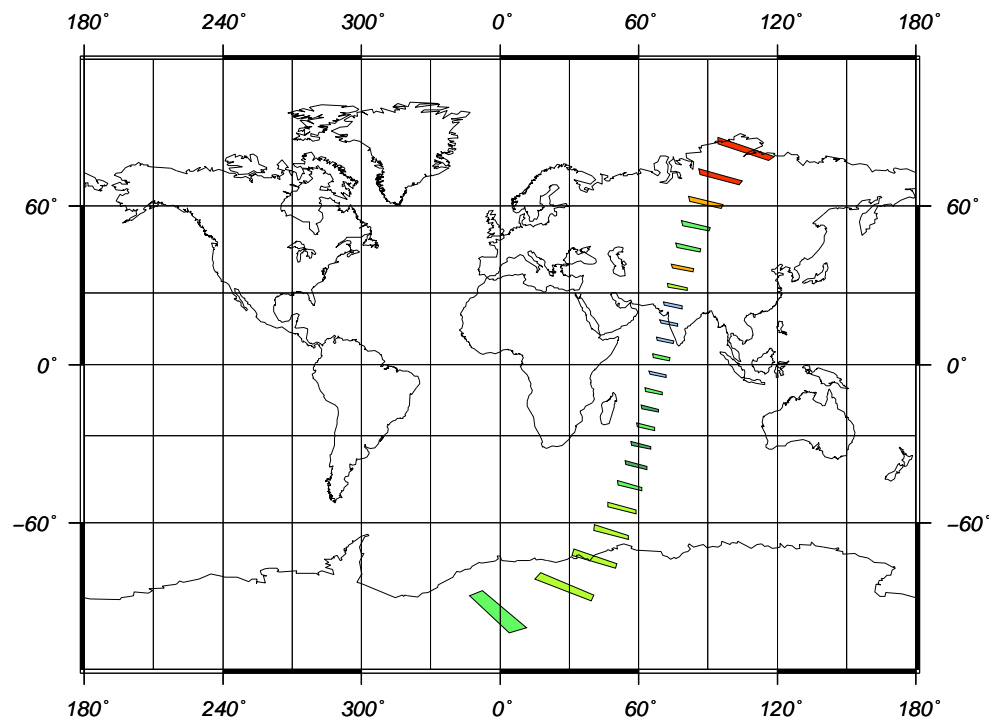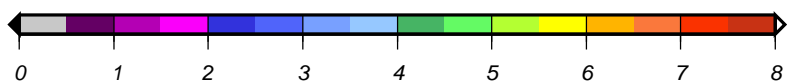

Ozone [ $\text{molec} \cdot 10^{12} / \text{cm}^3$ ]

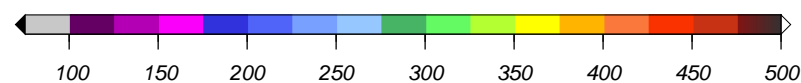

Ozone [DU]
